# Supplementary material
Source: PubMed Central journal article supplement (PMC9040175)
Supplement: mmc1.pdf [file mmc1.pdf]

**Supplemental information**

**Ad26.COVS.S breakthrough infections induce high  
titers of neutralizing antibodies against  
Omicron and other SARS-CoV-2 variants of concern**

**Dale Kitchin, Simone I. Richardson, Mieke A. van der Mescht, Thopisang Motlou, Nonkululeko Mzindle, Thandeka Moyo-Gwete, Zanele Makhado, Frances Ayres, Nelia P. Manamela, Holly Spencer, Bronwen Lambson, Brent Oosthuysen, Haajira Kaldine, Marizane du Pisanie, Mathilda Mennen, Sango Skelem, Noleen Williams, Ntobeko A.B. Ntusi, Wendy A. Burgers, Glenda G. Gray, Linda-Gail Bekker, Michael T. Boswell, Theresa M. Rossouw, Veronica Ueckermann, and Penny L. Moore**

**Supplementary Information**

**Table S1: Study participant details relating to Figure 1, 2 and 3**

| <b>PTID<sup>a</sup></b> | <b>Month of Vaccination</b> | <b>Age range at Vaccination</b> | <b>Gender</b> | <b>Month of BTI<sup>b</sup></b> | <b>Severity of infection</b> |
|-------------------------|-----------------------------|---------------------------------|---------------|---------------------------------|------------------------------|
| BTI01                   | 2021/02                     | 56-60                           | F             | 2021/06                         | Mild                         |
| BTI02                   | 2021/02                     | 36-40                           | F             | 2021/06                         | Mild                         |
| BTI03                   | 2021/02                     | 36-40                           | F             | 2021/07                         | Mild                         |
| BTI04                   | 2021/02                     | 56-60                           | F             | 2021/07                         | Mild                         |
| BTI05                   | 2021/03                     | 31-35                           | F             | 2021/08                         | Mild                         |
| BTI06*                  | 2021/02                     | 31-35                           | M             | 2021/07                         | Mild                         |
| V01                     | 2021/03                     | 56-60                           | F             | N/A                             | N/A                          |
| V02                     | 2021/03                     | 31-35                           | F             | N/A                             | N/A                          |
| V03                     | 2021/03                     | 31-35                           | M             | N/A                             | N/A                          |
| V04                     | 2021/03                     | 26-30                           | F             | N/A                             | N/A                          |
| V05                     | 2021/03                     | 31-35                           | M             | N/A                             | N/A                          |
| V06                     | 2021/03                     | 31-35                           | F             | N/A                             | N/A                          |
| V07                     | 2021/03                     | 51-55                           | F             | N/A                             | N/A                          |
| V08                     | 2021/03                     | 26-30                           | F             | N/A                             | N/A                          |
| V09                     | 2021/03                     | 31-35                           | F             | N/A                             | N/A                          |
| V10                     | 2021/03                     | 26-30                           | F             | N/A                             | N/A                          |
| V11                     | 2021/03                     | 26-30                           | F             | N/A                             | N/A                          |
| V12                     | 2021/03                     | 36-40                           | F             | N/A                             | N/A                          |
| V13                     | 2021/03                     | 26-30                           | F             | N/A                             | N/A                          |

<sup>a</sup> Participant identifier (PTID)

<sup>b</sup> Breakthrough infection (BTI)

\* No longitudinal samples available, only 2- and 6-month post-vaccination samples

N/A: Not applicable

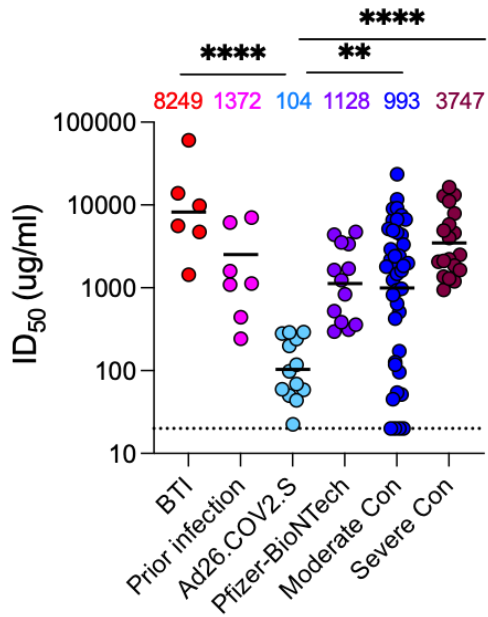

**Figure. S1: BTI neutralization responses to the D614G variant compared to vaccinees and convalescent plasma related to Figure 3.** Neutralization ID<sub>50</sub> titers of two-dose Pfizer-BioNTech (2-months post-vaccination) and one-dose Ad26.COVS vaccinees (2-months post-vaccination) and hospitalised convalescent individuals with moderate and severe infection 10-days after a positive PCR test are shown compared to BTI individuals (1-month post-infection). Individuals who were previously infected by SARS-CoV-2 prior to Ad26.CoV2.S vaccination are shown 2-months post-vaccination. Limit of detection is indicated by a dotted line. GMT is indicated by the black bars and above the plot, while significant differences between groups, as calculated by Kruskal-Wallis ANOVA with Dunns correction, are shown above the graph with with \*\* denoting p<0.01 and \*\*\*\* denoting p<0.0001.
